# Supplementary material for: Alien species revises systematic status: integrative species delimitation of two similar taxa of Symbrenthia Hübner, [1819] (Lepidoptera, Nymphalidae)
Source: PeerJ. 2023 Jan 30;11:e14644. doi: 10.7717/peerj.14644 (PMC9893915; doi:10.7717/peerj.14644)
Supplement: Supplemental Information 3 [file peerj-11-14644-s003.xlsx]

## Sheet: MatrixOutput
	YF201020	YF201018	YF201016	YF201015	AY788679	YF201001	YF174703	YF201019	YF201003	YF201013	YF201002	YF201021	KX300094	YF201017	YF181109	KP644229	KP644228	KJ649017	EU368155	EU368154
YF201020
YF201018	0
YF201016	0	0
YF201015	0	0	0
AY788679	0	0	0	0
YF201001	0.0524509	0.0524509	0.0524509	0.0524509	0.0524509
YF174703	0.0524509	0.0524509	0.0524509	0.0524509	0.0524509	0
YF201019	0.0524509	0.0524509	0.0524509	0.0524509	0.0524509	0	0
YF201003	0.0524509	0.0524509	0.0524509	0.0524509	0.0524509	0	0	0
YF201013	0.0524509	0.0524509	0.0524509	0.0524509	0.0524509	0	0	0	0
YF201002	0.0524509	0.0524509	0.0524509	0.0524509	0.0524509	0	0	0	0	0
YF201021	0.0524509	0.0524509	0.0524509	0.0524509	0.0524509	0	0	0	0	0	0
KX300094	0.0524509	0.0524509	0.0524509	0.0524509	0.0524509	0	0	0	0	0	0	0
YF201017	0.0524509	0.0524509	0.0524509	0.0524509	0.0524509	0	0	0	0	0	0	0	0
YF181109	0.0524509	0.0524509	0.0524509	0.0524509	0.0524509	0.00347224	0.00347224	0.00347224	0.00347224	0.00347224	0.00347224	0.00347224	0.00347224	0.00347224
KP644229	0.0505498	0.0505498	0.0505498	0.0505498	0.0505498	0.0017331	0.0017331	0.0017331	0.0017331	0.0017331	0.0017331	0.0017331	0.0017331	0.0017331	0.0017331
KP644228	0.0505498	0.0505498	0.0505498	0.0505498	0.0505498	0.0017331	0.0017331	0.0017331	0.0017331	0.0017331	0.0017331	0.0017331	0.0017331	0.0017331	0.0017331	0
KJ649017	0.0505498	0.0505498	0.0505498	0.0505498	0.0505498	0.00696875	0.00696875	0.00696875	0.00696875	0.00696875	0.00696875	0.00696875	0.00696875	0.00696875	0.00696875	0.00521744	0.00521744
EU368155	0.0524509	0.0524509	0.0524509	0.0524509	0.0524509	0.00521744	0.00521744	0.00521744	0.00521744	0.00521744	0.00521744	0.00521744	0.00521744	0.00521744	0.00521744	0.00347224	0.00347224	0.0017331
EU368154	0.0904117	0.0904117	0.0904117	0.0904117	0.0904117	0.0787191	0.0787191	0.0787191	0.0787191	0.0787191	0.0787191	0.0787191	0.0787191	0.0787191	0.0787191	0.0767583	0.0767583	0.0826639	0.0806876

## Sheet: Caption
Table. Estimates of Evolutionary Divergence between Sequences
The number of base substitutions per site from between sequences are shown. Analyses were conducted using the Kimura 2-parameter model [1]. This analysis involved 20 nucleotide sequences. Codon positions included were 1st+2nd+3rd+Noncoding. All ambiguous positions were removed for each sequence pair (pairwise deletion option). There were a total of 578 positions in the final dataset. Evolutionary…
1. Kimura M. (1980). A simple method for estimating evolutionary rate of base substitutions through comparative studies of nucleotide sequences. Journal of Molecular Evolution 16:111-120.
2. Tamura K., Stecher G., and Kumar S. (2021). MEGA 11: Molecular Evolutionary Genetics Analysis Version 11. Molecular Biology and Evolution https://doi.org/10.1093/molbev/msab120.
Disclaimer: Although utmost care has been taken to ensure the correctness of the caption, the caption text is provided "as is" without any warranty of any kind. Authors advise the user to carefully check the caption prior to its use for any purpose and report any errors or problems to the authors immediately (www.megasoftware.net). In no event shall the authors and their employers be liable for a…
