# Supplementary material for: Alien species revises systematic status: integrative species delimitation of two similar taxa of Symbrenthia Hübner, [1819] (Lepidoptera, Nymphalidae)
Source: PeerJ. 2023 Jan 30;11:e14644. doi: 10.7717/peerj.14644 (PMC9893915; doi:10.7717/peerj.14644)
Supplement: Supplemental Information 4 [file peerj-11-14644-s004.xlsx]

## Sheet: 工作表1
Genetic lot.	Genbank number	Species name	Collecting date	Collecting people	Collecting place
YF201020	LC727400	Symbrenthia formosanus	2017.05.10	L.Huang	TAIWAN: Taoyuan city, Fuxing, Ronghua
YF201018	LC727402	Symbrenthia formosanus	2018.4.20	Y.C.Lin	TAIWAN: Hualian county, Xiulin, Lushui
YF201016	LC727404	Symbrenthia formosanus	2020.06.07	Y.F.Hsu	TAIWAN: Taidong county, Haiduan, Liyuan
YF201015	LC727405	Symbrenthia formosanus	2021.06.16	C.W.Huang	TAIWAN: Xinbei City, Wulai, Fushan
YF201001	LC727409	Symbrenthia lilaea	2020.07.23	Y.F.Hsu	TAIWAN: Lianjian county, Nangan, Tiebao
YF174703	LC727411	Symbrenthia lilaea	2017.11.13	Y.F.Hsu	THAILAND: Chiang Mai Province, Mueang Chiang Mai
YF201019	LC727401	Symbrenthia lilaea	2020.01.23	L.Huang	TAIWAN: Xinbei City, Ruifeng, Shenao
YF201003	LC727407	Symbrenthia lilaea	2020.07.23	Y.F.Hsu	TAIWAN: Lianjian county, Nangan, Shengli Dam
YF201013	LC727406	Symbrenthia lilaea	2018.08.10	Y.F.Hsu	CHINA: Fujian Province, Wuyishan city, Tongmu village
YF201002	LC727408	Symbrenthia lilaea	2020.07.23	Y.F.Hsu	TAIWAN: Lianjian county, Nangan, Tiebao
YF201021	LC727399	Symbrenthia lilaea	2017.03.05	L.Huang	TAIWAN: Taoyuan city, Fuxing,Xuanyuan
YF201017	LC727403	Symbrenthia lilaea	2016.07.14	Y.F.Hsu	CHINA: Zhejiang province, Jingning county, chimushan
YF181109	LC727410	Symbrenthia lilaea	2017.09.28	L.Huang & H.C.Huang	CHINA: Sichuan province, Baoxing county, Fengtongzhai
